# Supplementary material
Source: PubMed Central journal article supplement (PMC3457664)
Supplement: NIHMS405481-supplement-1_si_001.pdf [file NIHMS405481-supplement-1_si_001.pdf]

# Supporting Information for

## Acetate-Bridged Platinum(III) Complexes Derived from Cisplatin

Justin J. Wilson and Stephen J. Lippard\*

*Department of Chemistry, Massachusetts Institute of Technology, Cambridge, MA*

**Email:** lippard@mit.edu

### Contents:

- Figure S1.** Cyclic voltammogram of  $[1](NO_3)_2$ .
- Figure S2.**  $^1H$  NMR spectra displaying the chemical reduction of  $[2](NO_3)_2$  with Zn.
- Figure S3.**  $^1H$  NMR spectra displaying the chemical reduction of  $[3](NO_3)_2$  with Zn.
- Figure S4.**  $^1H$  NMR spectra displaying the chemical reduction of  $[2](NO_3)_2$  with  $SnCl_2 \cdot 2H_2O$ .
- Figure S5.**  $^1H$  NMR spectra displaying the chemical reduction of  $[3](NO_3)_2$  with  $SnCl_2 \cdot 2H_2O$ .
- Figure S6.** DFT-optimized structure of  $[1](NO_3)^+$ .
- Figure S7.** DFT-optimized structure of  $[2](NO_3)^+$ .
- Figure S8.** DFT-optimized structure of  $[3](NO_3)^+$ .
- Figure S9.**  $^1H$  NMR spectrum of  $[4](NO_3)_4$  at room temperature.
- Figure S10.** NH-region of the  $^1H$  NMR spectrum of  $[4](NO_3)_4$  at variable temperatures.
- Figure S11.** High-temperature  $^{19}F$  NMR spectra of  $[4](NO_3)_4$ .
- Figure S12.**  $^1H$  and  $^{19}F$  NMR spectra of  $[4]^{4+}$  before and after the addition of  $NaNO_3$ .
- Table S1.** XYZ-Cartesian Coordinates ( $\text{\AA}$ ) of the DFT-Optimized Structure of  $[1]^{2+}$
- Table S2.** XYZ-Cartesian Coordinates ( $\text{\AA}$ ) of the DFT-Optimized Structure of  $[2]^{2+}$
- Table S3.** XYZ-Cartesian Coordinates ( $\text{\AA}$ ) of the DFT-Optimized Structure of  $[3]^{2+}$
- Table S4.** XYZ-Cartesian Coordinates ( $\text{\AA}$ ) of the DFT-Optimized Structure of  $[1](NO_3)^+$
- Table S5.** XYZ-Cartesian Coordinates ( $\text{\AA}$ ) of the DFT-Optimized Structure of  $[2](NO_3)^+$
- Table S6.** XYZ-Cartesian Coordinates ( $\text{\AA}$ ) of the DFT-Optimized Structure of  $[3](NO_3)^+$
- Table S7.** Comparison of X-ray Crystal Structure Refinement Parameters of  $[4]^{2+}$  with Isotropic Hydroxo and Amido Bridging Ligands
- Table S8.** Hydrogen-Bonding Metrics Involving the Bridging Amido Ligands of  $[4]^{4+}$

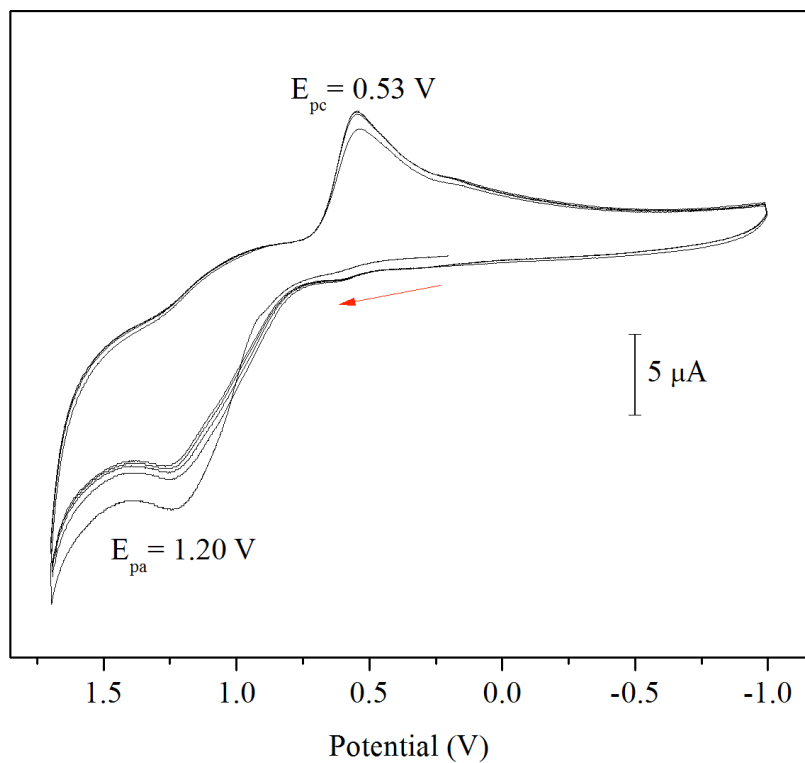

**Figure S1.** Cyclic voltammogram of  $[1](NO_3)_2$  in DMF with 0.1 M  $(Bu_4N)(PF_6)$  as supporting electrolyte, obtained at a scan rate of 100 mV/s. The red arrow denotes the initial potential and scan direction. Potentials are referenced to Ag/AgCl.

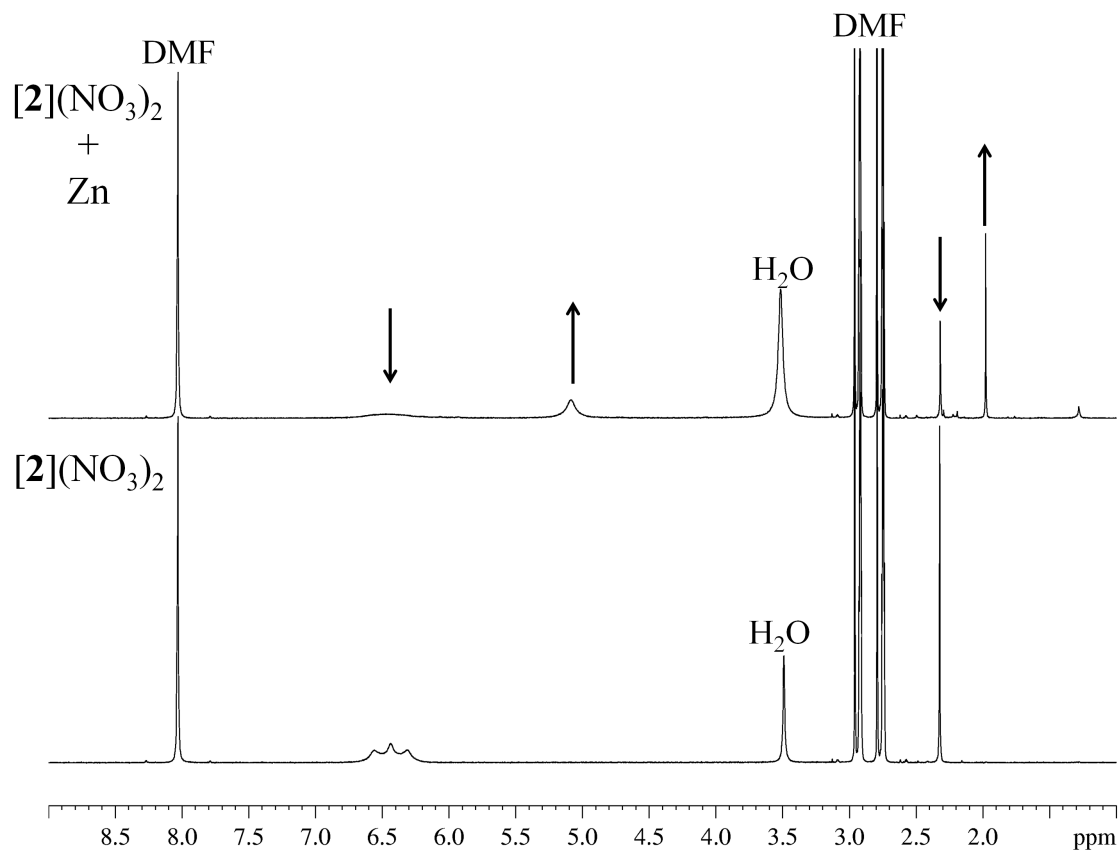

**Figure S2.**  $^1\text{H}$  NMR spectra of  $[\mathbf{2}](\text{NO}_3)_2$  before (bottom) and after (top) stirring with excess Zn dust in  $\text{DMF-}d_7$ . The downward arrows signify the disappearance of resonances from the platinum(III) starting material, and upward arrows mark the appearance of the resulting reduction product.

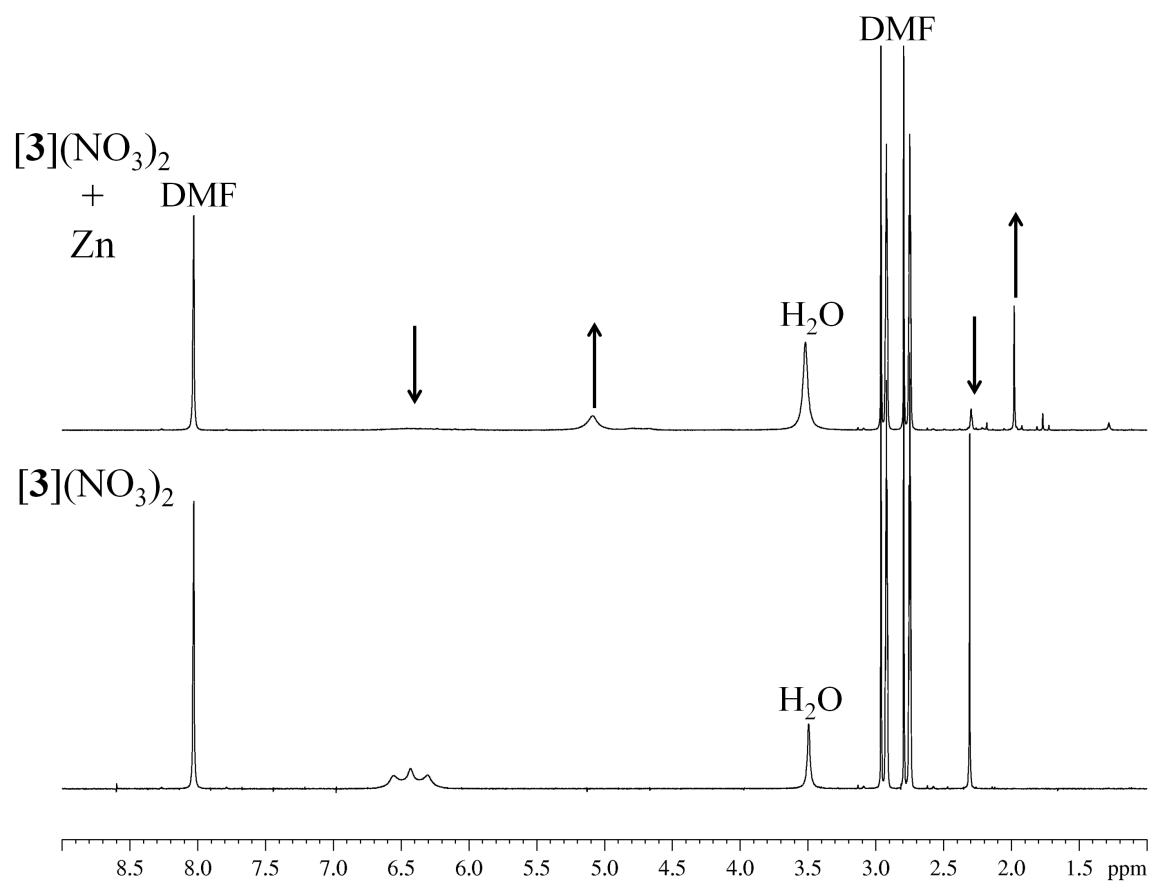

**Figure S3.**  $^1\text{H}$  NMR spectra of  $[\mathbf{3}](\text{NO}_3)_2$  before (bottom) and after (top) stirring with excess Zn dust in  $\text{DMF-}d_7$ . The downward arrows signify the disappearance of resonances from the platinum(III) starting material, and upward arrows mark the appearance of the resulting reduction product.

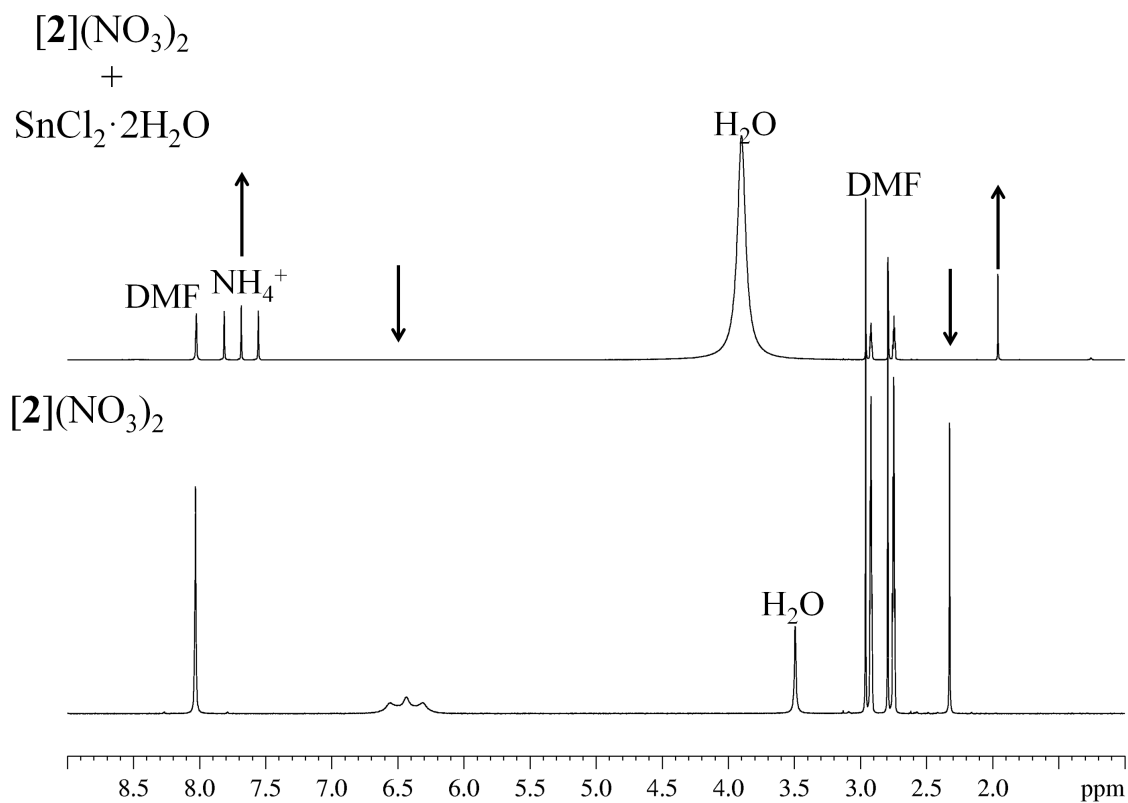

**Figure S4.**  $^1H$  NMR spectra of  $[2](NO_3)_2$  before (bottom) and after (top) stirring with excess  $SnCl_2 \cdot 2H_2O$  in  $DMF-d_7$ . The downward arrows signify the disappearance of resonances from the platinum(III) starting material, and upward arrows mark the appearance of the resulting reduction product.

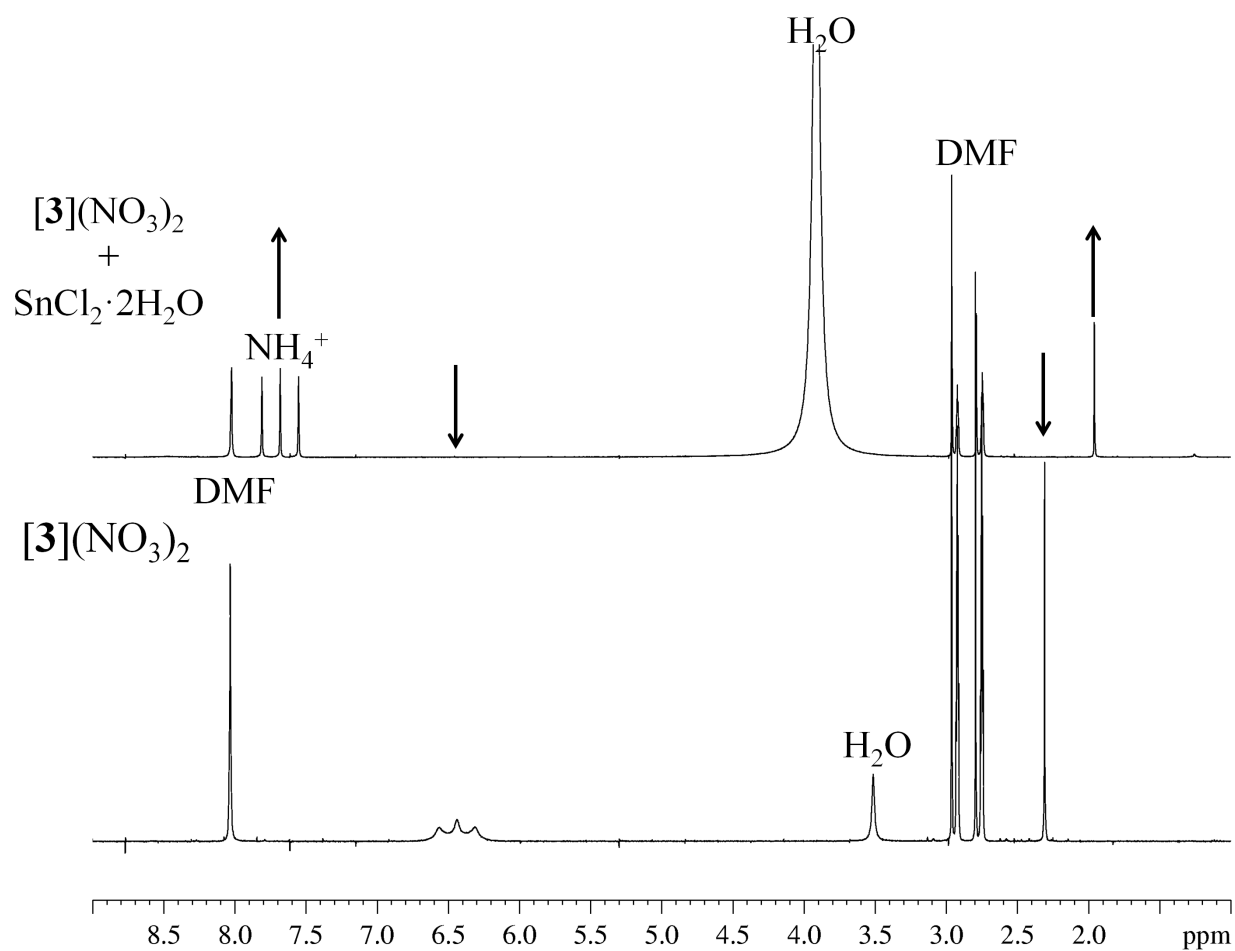

**Figure S5.** <sup>1</sup>H NMR spectra of [3](NO<sub>3</sub>)<sub>2</sub> before (bottom) and after (top) stirring with excess SnCl<sub>2</sub>·2H<sub>2</sub>O in DMF-*d*<sub>7</sub>. The downward arrows signify the disappearance of resonances from the platinum(III) starting material, and upward arrows mark the appearance of the resulting reduction product.

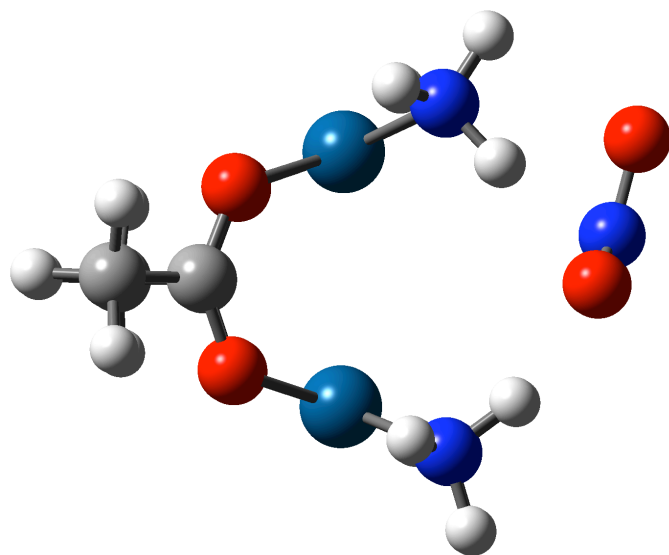

**Figure S6.** DFT-optimized structure of the ion pair,  $[1](\text{NO}_3)^+$ . Grey, blue, red, white, and teal spheres represent carbon, nitrogen, oxygen, hydrogen, and platinum atoms, respectively.

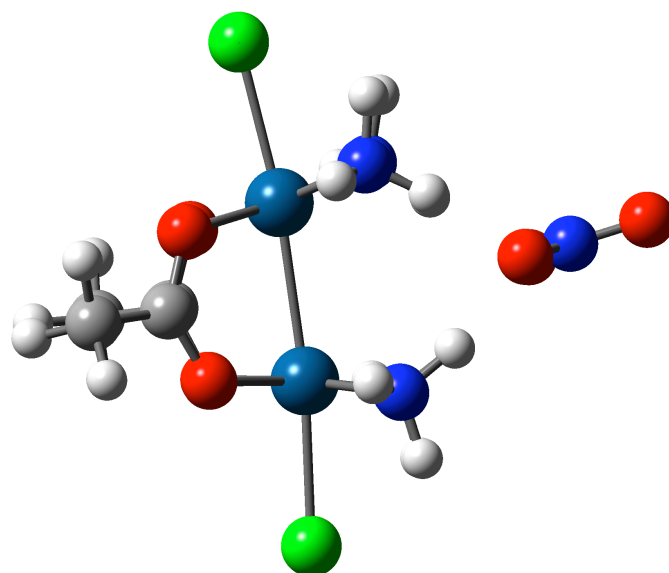

**Figure S7.** DFT-optimized structure of the ion pair,  $[2](\text{NO}_3)^+$ . Grey, blue, red, white, green, and teal spheres represent carbon, nitrogen, oxygen, hydrogen, chlorine, and platinum atoms, respectively.

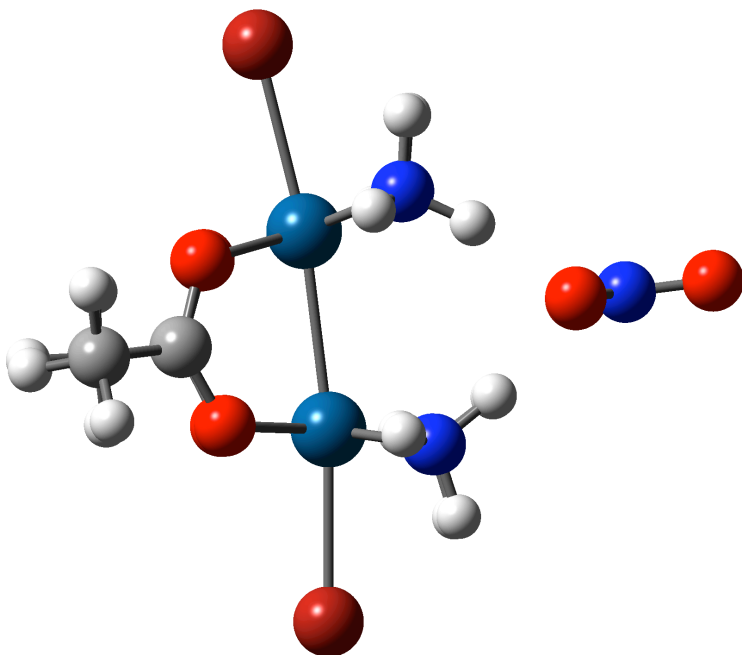

**Figure S8.** DFT-optimized structure of the ion pair,  $[3](NO_3)^+$ . Grey, blue, red, white, maroon, and teal spheres represent carbon, nitrogen, oxygen, hydrogen, bromine, and platinum atoms, respectively.

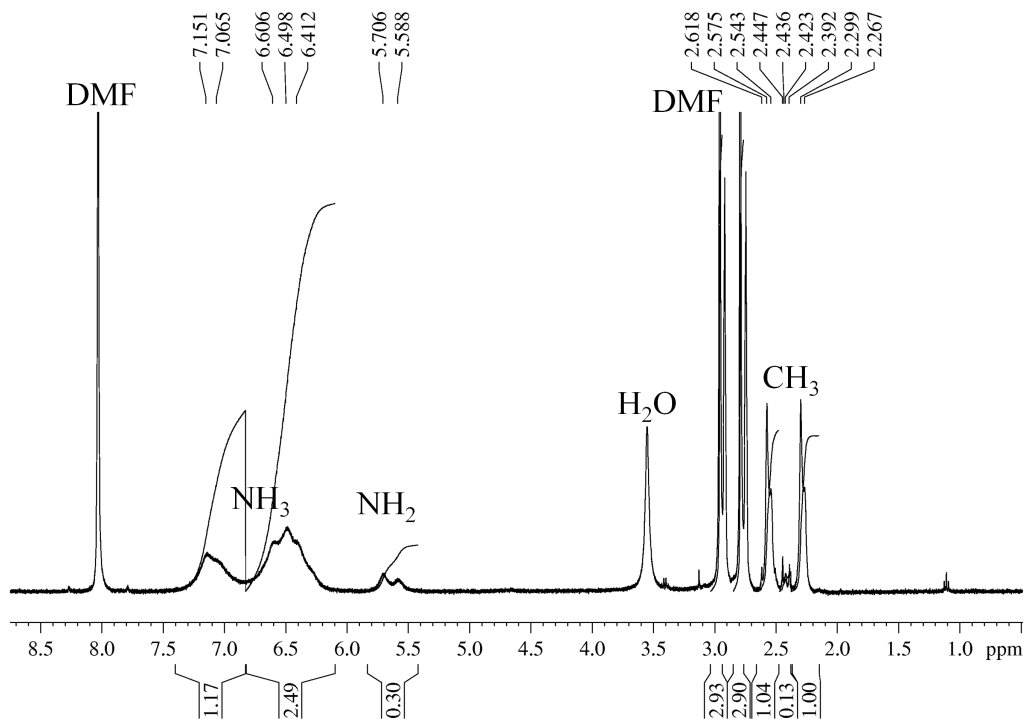

**Figure S9.**  $^1H$  NMR spectrum of  $[4](NO_3)_4$  in  $DMF-d_7$  at room temperature.



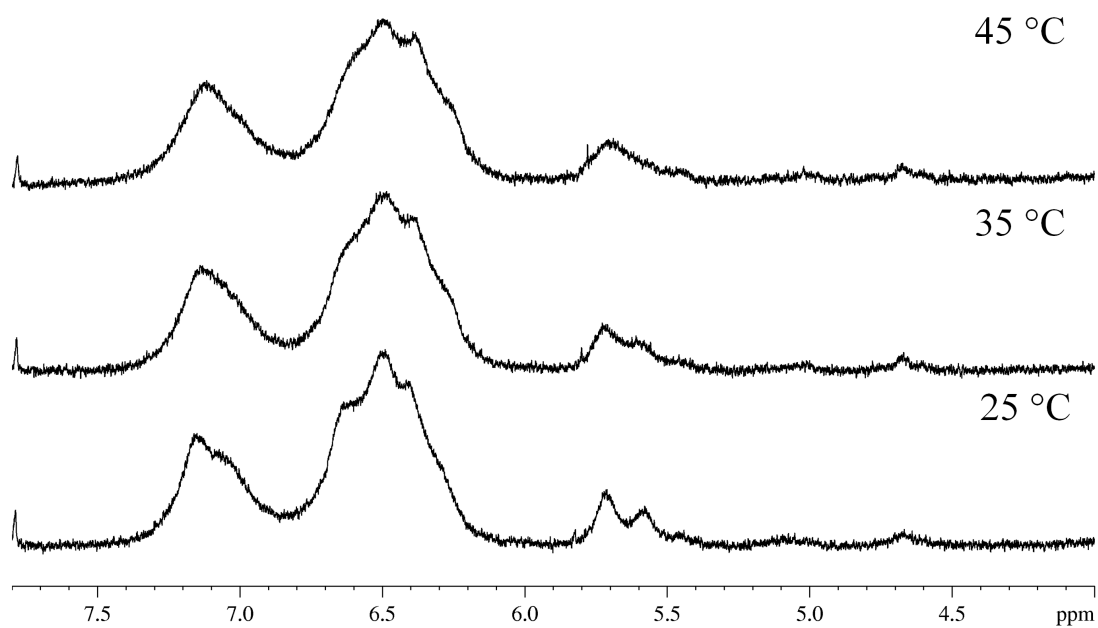

**Figure S10.** NH-region of the  $^1\text{H}$  NMR spectrum of  $[\mathbf{4}](\text{NO}_3)_4$  at different temperatures.

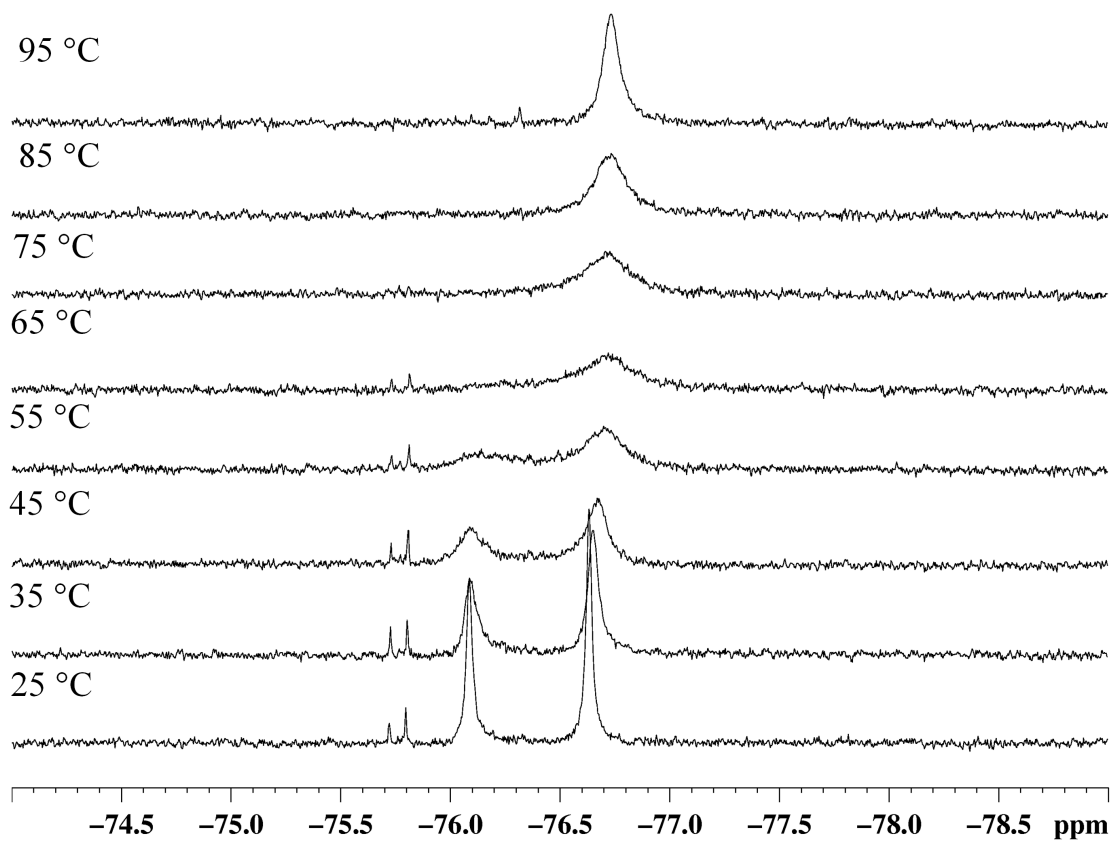

**Figure S11.** Variable-temperature  $^{19}\text{F}$  NMR spectrum of  $[\mathbf{4}](\text{NO}_3)_4$  in  $\text{DMF-}d_7$ .

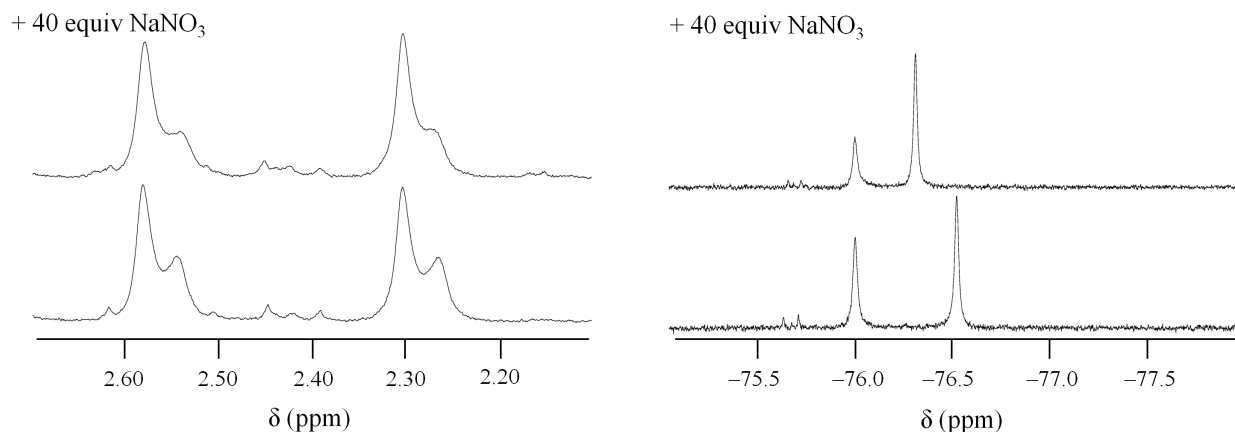

**Figure S12.**  $^1\text{H}$  (left) and  $^{19}\text{F}$  (right) NMR spectra of  $[\mathbf{4}]^{4+}$  before (bottom) and after (top) the addition of 40 equiv  $\text{NaNO}_3$  in  $\text{DMF-}d_7$ .

**Table S1.** XYZ-Cartesian Coordinates ( $\text{\AA}$ ) of the DFT-Optimized Structure of  $[\mathbf{1}]^{2+}$

|     |         |         |         |
|-----|---------|---------|---------|
| Pt1 | -1.7802 | 0.0001  | -0.2392 |
| Pt2 | 1.7803  | -0.0001 | -0.2391 |
| O3  | -1.1285 | 1.5253  | 0.9397  |
| O4  | 1.1288  | -1.5251 | 0.9401  |
| O5  | -1.1286 | -1.5237 | 0.9417  |
| O6  | 1.1290  | 1.5235  | 0.9422  |
| N7  | -2.6837 | -1.5291 | -1.2747 |
| H8  | -3.6988 | -1.4445 | -1.3124 |
| H9  | -2.4861 | -2.3865 | -0.7564 |
| H10 | -2.3531 | -1.6632 | -2.2283 |
| N11 | 2.6835  | 1.5292  | -1.2749 |
| H12 | 2.4861  | 2.3866  | -0.7565 |
| H13 | 2.3526  | 1.6633  | -2.2283 |
| H14 | 3.6986  | 1.4444  | -1.3129 |
| N15 | 2.6832  | -1.5282 | -1.2767 |
| H16 | 2.3528  | -1.6608 | -2.2306 |
| H17 | 2.4850  | -2.3863 | -0.7598 |
| H18 | 3.6984  | -1.4440 | -1.3141 |
| C19 | 0.0002  | 1.9391  | 1.3302  |
| N20 | -2.6834 | 1.5282  | -1.2766 |
| H21 | -3.6986 | 1.4441  | -1.3136 |
| H22 | -2.3533 | 1.6607  | -2.2306 |
| H23 | -2.4850 | 2.3862  | -0.7597 |

|     |         |         |        |
|-----|---------|---------|--------|
| C24 | 0.0001  | -1.9391 | 1.3302 |
| C25 | -0.0000 | -3.0205 | 2.3605 |
| H26 | 0.9016  | -3.6269 | 2.2878 |
| H27 | -0.8978 | -3.6319 | 2.2821 |
| H28 | -0.0048 | -2.5406 | 3.3453 |
| C29 | -0.0004 | 3.0205  | 2.3605 |
| H30 | -0.0138 | 2.5407  | 3.3452 |
| H31 | -0.8947 | 3.6364  | 2.2769 |
| H32 | 0.9045  | 3.6225  | 2.2931 |

**Table S2.** XYZ-Cartesian Coordinates (Å) of the DFT-Optimized Structure of [2]<sup>2+</sup>

|     |         |         |         |
|-----|---------|---------|---------|
| Pt1 | -1.3526 | 0.0050  | -0.2804 |
| Pt2 | 1.3526  | -0.0051 | -0.2803 |
| Cl3 | -3.7596 | 0.0086  | 0.1414  |
| O4  | -1.0727 | 1.3094  | 1.2558  |
| Cl5 | 3.7596  | -0.0087 | 0.1413  |
| O6  | 1.0727  | -1.3092 | 1.2560  |
| O7  | -1.1223 | -1.6005 | 0.9389  |
| O8  | 1.1223  | 1.6006  | 0.9388  |
| N9  | -1.9102 | -1.3840 | -1.7072 |
| H10 | -2.9329 | -1.2997 | -1.7553 |
| H11 | -1.7248 | -2.3170 | -1.3381 |
| H12 | -1.5256 | -1.3191 | -2.6460 |
| N13 | 1.9102  | 1.3837  | -1.7074 |
| H14 | 1.7254  | 2.3168  | -1.3380 |
| H15 | 1.5251  | 1.3191  | -2.6460 |
| H16 | 2.9328  | 1.2991  | -1.7560 |
| N17 | 1.8568  | -1.6593 | -1.4190 |
| H18 | 1.5970  | -1.6712 | -2.4021 |
| H19 | 1.5215  | -2.5189 | -0.9865 |
| H20 | 2.8830  | -1.6813 | -1.3510 |
| C21 | 0.0372  | 1.8454  | 1.5509  |
| N22 | -1.8568 | 1.6592  | -1.4191 |
| H23 | -2.8830 | 1.6816  | -1.3505 |
| H24 | -1.5976 | 1.6707  | -2.4024 |
| H25 | -1.5209 | 2.5188  | -0.9870 |
| C26 | -0.0372 | -1.8453 | 1.5511  |
| C27 | -0.0745 | -2.8125 | 2.6757  |
| H28 | 0.9121  | -3.2374 | 2.8548  |
| H29 | -0.8207 | -3.5849 | 2.4853  |
| H30 | -0.3903 | -2.2656 | 3.5717  |
| C31 | 0.0744  | 2.8129  | 2.6754  |
| H32 | 0.3906  | 2.2661  | 3.5714  |
| H33 | -0.9121 | 3.2375  | 2.8547  |

H34 0.8204 3.5854 2.4848

**Table S3.** XYZ-Cartesian Coordinates (Å) of the DFT-Optimized Structure of [3]<sup>2+</sup>

|      |         |         |         |
|------|---------|---------|---------|
| Pt1  | 1.3713  | -0.0052 | -0.3071 |
| Pt2  | -1.3713 | 0.0052  | -0.3071 |
| O3   | 1.0737  | -1.3130 | 1.2252  |
| O4   | -1.0737 | 1.3130  | 1.2252  |
| O5   | 1.1233  | 1.6023  | 0.9093  |
| O6   | -1.1233 | -1.6023 | 0.9093  |
| N7   | 1.9226  | 1.3828  | -1.7385 |
| H8   | 2.9398  | 1.2829  | -1.8357 |
| H9   | 1.7720  | 2.3135  | -1.3476 |
| H10  | 1.4942  | 1.3400  | -2.6595 |
| N11  | -1.9226 | -1.3829 | -1.7385 |
| H12  | -1.7720 | -2.3135 | -1.3476 |
| H13  | -1.4942 | -1.3400 | -2.6595 |
| H14  | -2.9398 | -1.2830 | -1.8357 |
| N15  | -1.8702 | 1.6596  | -1.4499 |
| H16  | -1.5695 | 1.6854  | -2.4210 |
| H17  | -1.5594 | 2.5161  | -0.9932 |
| H18  | -2.8982 | 1.6769  | -1.4240 |
| C19  | -0.0369 | -1.8479 | 1.5183  |
| N20  | 1.8702  | -1.6596 | -1.4499 |
| H21  | 2.8982  | -1.6770 | -1.4240 |
| H22  | 1.5695  | -1.6854 | -2.4210 |
| H23  | 1.5594  | -2.5161 | -0.9932 |
| C24  | 0.0369  | 1.8479  | 1.5183  |
| C25  | 0.0736  | 2.8193  | 2.6403  |
| H26  | -0.9137 | 3.2418  | 2.8204  |
| H27  | 0.8164  | 3.5939  | 2.4457  |
| H28  | 0.3934  | 2.2770  | 3.5376  |
| C29  | -0.0736 | -2.8192 | 2.6404  |
| H30  | -0.3933 | -2.2768 | 3.5377  |
| H31  | 0.9137  | -3.2418 | 2.8205  |
| H32  | -0.8164 | -3.5937 | 2.4458  |
| Br33 | -3.9125 | 0.0030  | 0.1749  |
| Br34 | 3.9125  | -0.0030 | 0.1749  |

**Table S4.** XYZ-Cartesian Coordinates (Å) of the DFT-Optimized Structure of [1](NO<sub>3</sub>)<sup>+</sup>

|     |         |         |         |
|-----|---------|---------|---------|
| Pt1 | -0.9128 | -1.2040 | -0.0000 |
| Pt2 | 1.2082  | 1.1083  | -0.0000 |
| O3  | 0.3679  | -1.7633 | 1.5036  |
| O4  | 1.9087  | -0.1148 | -1.4907 |

|     |         |         |         |
|-----|---------|---------|---------|
| O5  | 0.3683  | -1.7637 | -1.5031 |
| O6  | 1.9083  | -0.1145 | 1.4911  |
| N7  | -2.2369 | -0.8195 | -1.5162 |
| H8  | -3.1981 | -1.0799 | -1.3104 |
| H9  | -1.9380 | -1.3396 | -2.3390 |
| H10 | -2.2597 | 0.1833  | -1.7408 |
| N11 | 0.5970  | 2.3998  | 1.4574  |
| H12 | 0.8299  | 2.0164  | 2.3708  |
| H13 | -0.4314 | 2.4978  | 1.3825  |
| H14 | 1.0309  | 3.3181  | 1.4039  |
| N15 | 0.5974  | 2.3996  | -1.4578 |
| H16 | -0.4309 | 2.4983  | -1.3831 |
| H17 | 0.8299  | 2.0155  | -2.3711 |
| H18 | 1.0320  | 3.3175  | -1.4049 |
| C19 | 1.4345  | -1.2115 | 1.8985  |
| N20 | -2.2373 | -0.8193 | 1.5157  |
| H21 | -3.1990 | -1.0772 | 1.3086  |
| H22 | -2.2585 | 0.1831  | 1.7420  |
| H23 | -1.9403 | -1.3413 | 2.3380  |
| C24 | 1.4349  | -1.2120 | -1.8980 |
| C25 | 2.2219  | -1.9411 | -2.9414 |
| H26 | 2.8043  | -1.2431 | -3.5410 |
| H27 | 1.5658  | -2.5479 | -3.5640 |
| H28 | 2.9183  | -2.6126 | -2.4293 |
| C29 | 2.2210  | -1.9405 | 2.9424  |
| H30 | 2.9132  | -2.6168 | 2.4308  |
| H31 | 1.5639  | -2.5426 | 3.5684  |
| H32 | 2.8077  | -1.2431 | 3.5384  |
| N33 | -2.6919 | 1.7760  | -0.0002 |
| O34 | -3.7164 | 1.1017  | 0.0001  |
| O35 | -2.1531 | 2.1000  | 1.0862  |
| O36 | -2.1528 | 2.0985  | -1.0870 |

**Table S5.** XYZ-Cartesian Coordinates (Å) of the DFT-Optimized Structure of [2](NO<sub>3</sub>)<sup>+</sup>

|     |         |         |         |
|-----|---------|---------|---------|
| Pt1 | 1.0971  | -0.7529 | -0.0047 |
| Pt2 | -1.2717 | 0.4564  | -0.0042 |
| Cl3 | 3.1453  | -2.0887 | 0.0017  |
| O4  | 0.2427  | -1.9504 | -1.4303 |
| Cl5 | -3.5527 | 1.3369  | -0.0037 |
| O6  | -1.7268 | -0.8896 | 1.4713  |
| O7  | 0.2932  | -1.8606 | 1.5188  |
| O8  | -1.7325 | -0.8911 | -1.4755 |
| N9  | 2.0792  | 0.3274  | 1.4234  |
| H10 | 3.0772  | 0.1476  | 1.2981  |

|     |         |         |         |
|-----|---------|---------|---------|
| H11 | 1.8378  | -0.0536 | 2.3365  |
| H12 | 1.8866  | 1.3480  | 1.3883  |
| N13 | -0.9713 | 1.8517  | -1.4612 |
| H14 | -0.9726 | 1.4095  | -2.3776 |
| H15 | -0.0912 | 2.3888  | -1.3239 |
| H16 | -1.7879 | 2.4668  | -1.4348 |
| N17 | -0.9723 | 1.8593  | 1.4498  |
| H18 | -0.1059 | 2.4178  | 1.3188  |
| H19 | -0.9616 | 1.4189  | 2.3672  |
| H20 | -1.8012 | 2.4588  | 1.4269  |
| C21 | -0.9471 | -1.8138 | -1.8396 |
| N22 | 2.0345  | 0.2548  | -1.5155 |
| H23 | 3.0179  | -0.0234 | -1.4704 |
| H24 | 1.9426  | 1.2868  | -1.4525 |
| H25 | 1.6854  | -0.0788 | -2.4116 |
| C26 | -0.9107 | -1.7570 | 1.8968  |
| C27 | -1.4016 | -2.7320 | 2.9099  |
| H28 | -2.2174 | -2.3012 | 3.4888  |
| H29 | -0.5830 | -3.0621 | 3.5484  |
| H30 | -1.7864 | -3.6055 | 2.3732  |
| C31 | -1.4635 | -2.8152 | -2.8137 |
| H32 | -1.9730 | -3.6010 | -2.2464 |
| H33 | -0.6428 | -3.2678 | -3.3681 |
| H34 | -2.1942 | -2.3547 | -3.4779 |
| N35 | 1.9160  | 3.5246  | -0.0047 |
| O36 | 2.6188  | 4.4871  | -0.0389 |
| O37 | 1.5234  | 2.9454  | -1.0734 |
| O38 | 1.5254  | 3.0206  | 1.1005  |

**Table S6.** XYZ-Cartesian Coordinates (Å) of the DFT-Optimized Structure of [3](NO<sub>3</sub>)<sup>+</sup>

|     |         |         |         |
|-----|---------|---------|---------|
| Pt1 | -1.3431 | -0.1172 | -0.0012 |
| Pt2 | 1.3424  | -0.1190 | 0.0010  |
| O3  | -1.1196 | -1.5460 | 1.4521  |
| O4  | 1.1168  | -1.5495 | -1.4505 |
| O5  | -1.1262 | -1.5010 | -1.4966 |
| O6  | 1.1235  | -1.5009 | 1.4978  |
| N7  | -1.7184 | 1.2784  | -1.4468 |
| H8  | -2.7213 | 1.4753  | -1.4095 |
| H9  | -1.5419 | 0.8714  | -2.3628 |
| H10 | -1.1655 | 2.1521  | -1.3357 |
| N11 | 1.7195  | 1.2777  | 1.4451  |
| H12 | 1.5435  | 0.8713  | 2.3615  |
| H13 | 1.1670  | 2.1517  | 1.3340  |
| H14 | 2.7224  | 1.4740  | 1.4070  |

|      |         |         |         |
|------|---------|---------|---------|
| N15  | 1.7106  | 1.2439  | -1.4784 |
| H16  | 1.1819  | 2.1308  | -1.3613 |
| H17  | 1.5019  | 0.8343  | -2.3862 |
| H18  | 2.7185  | 1.4186  | -1.4665 |
| C19  | 0.0023  | -1.9576 | 1.8678  |
| N20  | -1.7090 | 1.2485  | 1.4761  |
| H21  | -2.7166 | 1.4249  | 1.4641  |
| H22  | -1.1786 | 2.1342  | 1.3572  |
| H23  | -1.5007 | 0.8402  | 2.3846  |
| C24  | -0.0057 | -1.9599 | -1.8658 |
| C25  | -0.0104 | -3.0719 | -2.8574 |
| H26  | 0.9115  | -3.0703 | -3.4373 |
| H27  | -0.8898 | -3.0071 | -3.4971 |
| H28  | -0.0644 | -4.0141 | -2.3021 |
| C29  | 0.0057  | -3.0684 | 2.8607  |
| H30  | 0.0681  | -4.0110 | 2.3070  |
| H31  | -0.9196 | -3.0702 | 3.4351  |
| H32  | 0.8810  | -2.9989 | 3.5056  |
| N33  | 0.0060  | 4.0706  | -0.0002 |
| O34  | 0.0126  | 5.2627  | -0.0014 |
| O35  | -0.0112 | 3.4021  | 1.0879  |
| O36  | 0.0160  | 3.3997  | -1.0868 |
| Br37 | 3.9062  | -0.4374 | -0.0027 |
| Br38 | -3.9075 | -0.4314 | 0.0026  |

**Table S7.** Comparison of X-Ray Crystallographic Refinement Parameters of [4]<sup>4+</sup> with Isotropically Refined Bridging Amido and Hydroxo Ligands<sup>a</sup>

| Atom-Type Assignment | U <sub>iso</sub> | R1, all data (%) | wR2, all data (%) |
|----------------------|------------------|------------------|-------------------|
| N (amido)            | 0.03029          | 7.62             | 14.87             |
| O (hydroxo)          | 0.04929          | 7.64             | 14.86             |

<sup>a</sup> R1 and wR2 are defined in the footnote of Table 1, main text.

**Table S8.** Hydrogen-Bonding Metrics Involving the Bridging Amido Ligands of [4]<sup>4+</sup>

| Donor-Acceptor Pair                                                                       | Donor-Acceptor Distance (Å) | Hydrogen-Acceptor Distance (Å) | Donor-Hydrogen-Acceptor Angle (deg) |
|-------------------------------------------------------------------------------------------|-----------------------------|--------------------------------|-------------------------------------|
| N4 <sup>+</sup> ···O12 (μ-NH <sub>2</sub> <sup>+</sup> ···ONO <sub>2</sub> <sup>-</sup> ) | 2.845(14)                   | 1.93                           | 170.9                               |
| N4 <sup>+</sup> ···O13 (μ-NH <sub>2</sub> <sup>+</sup> ···O-DMF)                          | 2.833(12)                   | 1.99                           | 152.2                               |
